# Supplementary material for: Relationships between regional coastal land cover distributions and elevation reveal data uncertainty in a sea-level rise impacts model
Source: Copernicus journal article supplement (doi:10.5194/esurf-7-429-2019), 2019-05-15
Supplement: Supplementary file 1 [file esurf-7-429-2019-supplement.pdf]

Supplement of Earth Surf. Dynam., 7, 429–438, 2019  
<https://doi.org/10.5194/esurf-7-429-2019-supplement>  
© Author(s) 2019. This work is distributed under  
the Creative Commons Attribution 4.0 License.

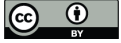

*Supplement of*

## **Relationships between regional coastal land cover distributions and elevation reveal data uncertainty in a sea-level rise impacts model**

**Erika E. Lentz et al.**

*Correspondence to:* Erika E. Lentz (elentz@usgs.gov)

The copyright of individual parts of the supplement might differ from the CC BY 4.0 License.

## Introduction

This supplement includes a figure and tables that provide background information on 1) the coastal response model introduced in Lentz et al. (2016), as well as 2) confusion matrices used to compare land cover data sources and predictions of elevation when land cover data were used as inputs (and vice versa). The coastal response model figure is modified from previous publications (Lentz et al., 2015; 2016), and the table shows the general land cover groupings used in Lentz et al. (2016). The confusion matrices show the distributions of data in each category for the full 30 m x 30 m Northeastern U.S. region, totaling more than 42 million grid cells. The diagonal fields in the confusion matrices (upper left cell to lower right) show where predicted values matched observed values; accuracy rates reported in the captions are calculated as the sum of the diagonal divided by the total number of cells. The code used to generate the two-node Bayesian network using Netica software is included at the end of this document.

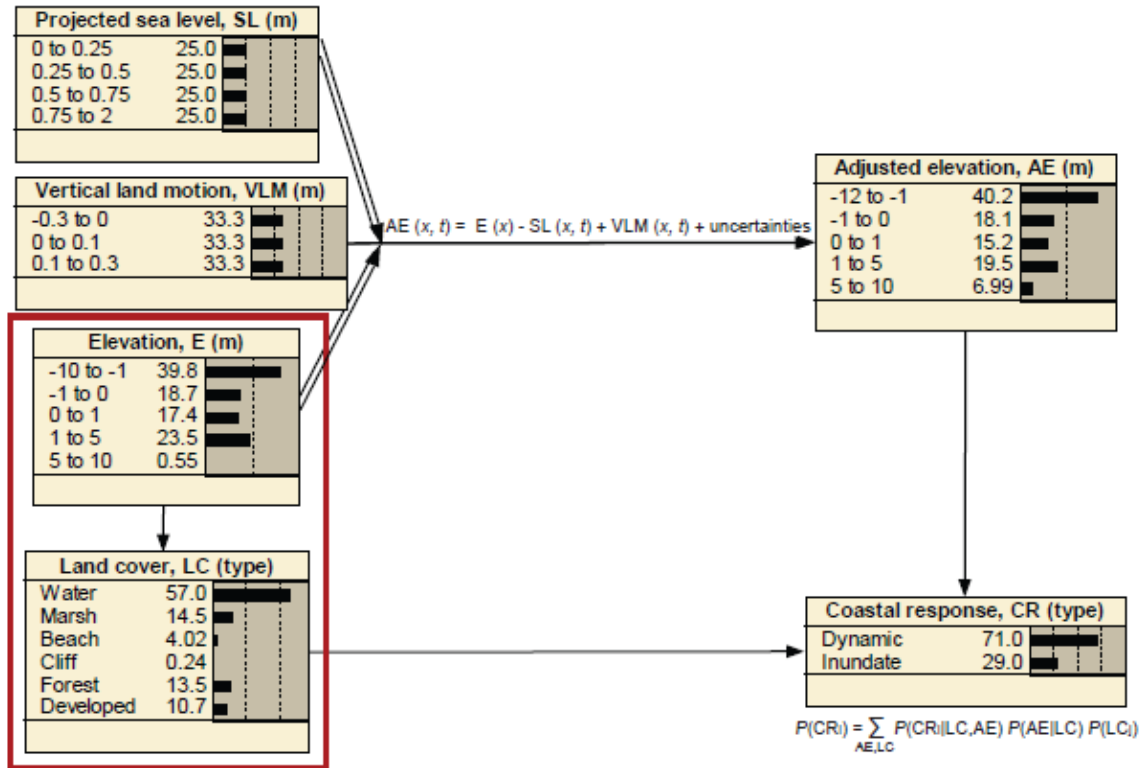

**Figure S1.** Diagram showing Bayesian network coastal response model, including data inputs (left) and predicted outcomes (right), including adjusted elevation (inundation model equivalent) and coastal response, wherein the response is binary such that dynamic implies “non-inundate”. Horizontal bars shown in the boxes represent prior distributions (probability of occurrence) for each parameter. Uniform distributions for sea-level and vertical land motion parameters provide an equal likelihood of occurrence until a time step is specified. Correlation among nodes are shown by the arrows between them. Equations show deterministic and probabilistic equations used to generate conditional probabilities, where  $x$  and  $t$  indicate spatial and temporal dependence, and joint correlations of occurrence  $i$ , at a specific location,  $j$ . Red box highlights E-LC relationship trained via Bayes theorem (equation 1) and further tested in this paper. Modified from Lentz et al. (2015, 2016).

| <b>Land Cover Category*</b> | <b>Included DSL Classes*</b>                                                                                                               | <b>CCAP/DSL comparison</b> | <b>Included CCAP Classes</b>                                                                                                                                                    |
|-----------------------------|--------------------------------------------------------------------------------------------------------------------------------------------|----------------------------|---------------------------------------------------------------------------------------------------------------------------------------------------------------------------------|
| Subaqueous                  | Bays, lakes, rivers, marine and estuarine subtidal, and deepwater                                                                          | Subaqueous                 | Open Water, Palustrine Aquatic Bed, Estuarine Aquatic Bed                                                                                                                       |
| Marsh                       | Salt and freshwater marshes, bogs, swamps, fens, wetland forests, intertidal aquatic beds, and reefs                                       | Marsh                      | Palustrine Forested Wetland, Palustrine Scrub/Shrub Wetland, Palustrine Emergent Wetland, Estuarine Forested Wetland, Estuarine Scrub/Shrub Wetland, Estuarine Emergent Wetland |
| Beach                       | Dune and swale/sandy beach (including bluffs), marine and estuarine intertidal unconsolidated shore                                        | Bare Land                  | Unconsolidated Shore, Bare Land                                                                                                                                                 |
| Rocky                       | Rocky outcrops and shores, marine and estuarine intertidal rock bottom                                                                     |                            |                                                                                                                                                                                 |
| Forest                      | Forests, woodlands, grasslands, agricultural, shrub lands                                                                                  | Non-Marsh Vegetation       | Cultivated Land, Pasture/Hay, Grassland, Deciduous Forest, Evergreen Forest, Mixed Forest, Scrub/Shrub                                                                          |
| Developed                   | All National Land Cover Dataset developed classes (open space, low, medium, and high density), roads, active and abandoned railroad tracks | Developed                  | High Intensity Developed, Medium Intensity Developed, Low Intensity Developed, Developed Open Space                                                                             |

**Table S1.** The land-cover classes falling within the six generalized land-cover categories, from Lentz et al. (2015) and as reclassified for use in comparison with Coastal Change Analysis Program (CCAP) data.

| DSL Land Cover                 | C-CAP Land Cover |                |               |                      |                | Total           | User's accuracy (%) |
|--------------------------------|------------------|----------------|---------------|----------------------|----------------|-----------------|---------------------|
|                                | Subaqueous       | Marsh          | Bare land     | Non-Marsh Vegetation | Developed      |                 |                     |
| Subaqueous                     | <b>22027171</b>  | 625725         | 238956        | 121072               | 170173         | 23183097        | 95                  |
| Marsh                          | 376230           | <b>5432643</b> | 40901         | 319470               | 120669         | 6289913         | 86.4                |
| Bare Land                      | 961149           | 386365         | <b>390012</b> | 63422                | 39551          | 1840499         | 21.2                |
| Non-Marsh Vegetation           | 69146            | 1351262        | 47797         | <b>4509443</b>       | 186375         | 6164023         | 73.2                |
| Developed                      | 61270            | 454146         | 70835         | 938883               | <b>3750745</b> | 5275879         | 71.1                |
| <b>Ground truth</b>            | 23494966         | 8250141        | 788501        | 5952290              | 4267513        | <i>42753411</i> |                     |
| <b>Producer's accuracy (%)</b> | 93.8             | 65.8           | 49.5          | 75.8                 | 87.9           |                 |                     |

**Table S2.** Confusion matrix showing comparison between Coastal Change Analysis Program (C-CAP) and Designing Sustainable Landscapes (DSL) land cover datasets with user's error (accuracy) and producer's error (reliability). The overall accuracy rate in this comparison is 85%, where CCAP data are considered as ground truth.

| Actual                  | Predicted (m)   |                |          |          |                |              | Total           | User's accuracy (%) |
|-------------------------|-----------------|----------------|----------|----------|----------------|--------------|-----------------|---------------------|
|                         | Water           | Marsh          | Beach    | Rocky    | Forest         | Developed    |                 |                     |
| <b>Water</b>            | <b>22091861</b> | 1591392        | 0        | 0        | 446390         | 12107        | 24141750        | 91.5                |
| <b>Marsh</b>            | 1290019         | <b>2918228</b> | 0        | 0        | 1890412        | 25752        | 6124411         | 47.6                |
| <b>Beach</b>            | 1048226         | 450741         | <b>0</b> | 0        | 174218         | 21048        | 1694233         | 0                   |
| <b>Rocky</b>            | 62315           | 22883          | 0        | <b>0</b> | 15976          | 1240         | 102414          | 0                   |
| <b>Forest</b>           | 147539          | 1420429        | 0        | 0        | <b>4016932</b> | 80731        | 5665631         | 70.9                |
| <b>Developed</b>        | 139712          | 925392         | 0        | 0        | 3352471        | <b>90485</b> | 4508060         | 2                   |
| Ground truth            | 24779672        | 7329065        | 0        | 0        | 9896399        | 231363       | <b>42236499</b> |                     |
| Producer's accuracy (%) | 89.2            | 39.8           |          |          | 40.6           | 39.1         |                 |                     |

**Table S3a.** Confusion matrix showing comparison between predicted land cover and measured (observed) land cover when elevation data are used as inputs with original distributions, with user's error (accuracy) and producer's error (reliability). The overall accuracy rate for this comparison is 69%.

| Actual                  | Predicted (m)   |                |               |          |          |                | Total           | User's accuracy (%) |
|-------------------------|-----------------|----------------|---------------|----------|----------|----------------|-----------------|---------------------|
|                         | Water           | Marsh          | Beach         | Rocky    | Forest   | Developed      |                 |                     |
| <b>Water</b>            | <b>16530433</b> | 1591392        | 5561428       | 0        | 0        | 458497         | 24141750        | 68.5                |
| <b>Marsh</b>            | 60470           | <b>2918228</b> | 1229549       | 0        | 0        | 1916164        | 6124411         | 47.6                |
| <b>Beach</b>            | 217137          | 450741         | <b>831089</b> | 0        | 0        | 195266         | 1694233         | 49.1                |
| <b>Rocky</b>            | 35964           | 22883          | 26351         | <b>0</b> | 0        | 17216          | 102414          | 0.0                 |
| <b>Forest</b>           | 11445           | 1420429        | 136094        | 0        | <b>0</b> | 4097663        | 5665631         | 0.0                 |
| <b>Developed</b>        | 26099           | 925392         | 113613        | 0        | 0        | <b>3442956</b> | 4508060         | 76.4                |
| Ground truth            | 16881548        | 7329065        | 7898124       | 0        | 0        | 10127762       | <b>42236499</b> |                     |
| Producer's accuracy (%) | 97.9            | 39.8           | 10.5          |          |          | 34             |                 |                     |

**Table S3b.** Confusion matrix showing comparison between predicted land cover and measured (observed) land cover when elevation data are used as inputs with uniform distributions, with user's error (accuracy) and producer's error (reliability). The overall accuracy rate for this comparison is 56%

| Actual (m)              | Predicted (m)   |               |                |                |          | Total           | User's accuracy (%) |
|-------------------------|-----------------|---------------|----------------|----------------|----------|-----------------|---------------------|
|                         | -10 to -1       | -1 to 0       | 0 to 1         | 1 to 5         | 5 to 10  |                 |                     |
| <b>-10 to -1</b>        | <b>16566397</b> | 217137        | 60470          | 37544          | 0        | 16881548        | 98.1                |
| <b>-1 to 0</b>          | 5587779         | <b>831089</b> | 1229549        | 249707         | 0        | 7898124         | 10.5                |
| <b>0 to 1</b>           | 1614275         | 450741        | <b>2918228</b> | 2345821        | 0        | 7329065         | 39.8                |
| <b>1 to 5</b>           | 462366          | 174218        | 1890412        | <b>7369403</b> | 0        | 9896399         | 74.5                |
| <b>5 to 10</b>          | 13347           | 21048         | 25752          | 171216         | <b>0</b> | 231363          | 0                   |
| Ground truth            | 24244164        | 1694233       | 6124411        | 10173691       | 0        | <b>42236499</b> |                     |
| Producer's accuracy (%) | 68.3            | 49.1          | 47.6           | 72.4           |          |                 |                     |

**Table S4a.** Confusion matrix showing comparison between predicted elevations and measured (observed) elevations when land cover data are used as inputs with original distributions, with user's error (accuracy) and producer's error (reliability). The overall accuracy rate for this comparison is 66%.

| Actual (m)              | Predicted (m)   |               |                |                |              | Total           | User's accuracy (%) |
|-------------------------|-----------------|---------------|----------------|----------------|--------------|-----------------|---------------------|
|                         | -10 to -1       | -1 to 0       | 0 to 1         | 1 to 5         | 5 to 10      |                 |                     |
| <b>-10 to -1</b>        | <b>16530433</b> | 217137        | 60470          | 11445          | 62063        | 16881548        | 97.9                |
| <b>-1 to 0</b>          | 5561428         | <b>831089</b> | 1229549        | 136094         | 139964       | 7898124         | 10.5                |
| <b>0 to 1</b>           | 1591392         | 450741        | <b>2918228</b> | 1420429        | 948275       | 7329065         | 39.8                |
| <b>1 to 5</b>           | 446390          | 174218        | 1890412        | <b>4016932</b> | 3368447      | 9896399         | 40.6                |
| <b>5 to 10</b>          | 12107           | 21048         | 25752          | 80731          | <b>91725</b> | 231363          | 39.6                |
| Ground truth            | 24141750        | 1694233       | 6124411        | 5665631        | 4610474      | <b>42236499</b> |                     |
| Producer's accuracy (%) | 68.5            | 49.1          | 20.1           | 70.9           | 73.1         |                 |                     |

**Table S4b.** Confusion matrix showing comparison between predicted elevations and measured (observed) elevations when land cover data are used as inputs with uniform distributions, with user's error (accuracy) and producer's error (reliability). The overall accuracy rate for this comparison is 58%.

## Bayesian Network Code

The code provided here is a text-formatted version of the two-node elevation-land cover Bayesian network (BN) models referenced in the paper that can be saved in a file with .dne file extension and opened with Netica (Norsys Software Corp, 2012). The data from the National Elevation Dataset (Gesch, 2007, adjusted to mean high water VDatum conversion grids (National Ocean Service, 2012)), the National Geophysical Data Center's Coastal Relief Model (National Oceanic and Atmospheric Administration, 2014), and McGarrigal et al., 2017 (land cover) can be used to train and run the BN using Netica software and application interfaces.

## Elevation – Land Cover Bayesian Network

// File created by LentzE at USGS using Netica 5.12 on Apr 12, 2019 at 16:06:03.

```
bnet LCENet {
AutoCompile = TRUE;
autoupdate = TRUE;
whenchanged = 1430849925;

visual V1 {
    defdispform = BELIEFBARS;
    nodelabeling = TITLE;
    NodeMaxNumEntries = 50;
    nodefont = font {shape= "Arial"; size= 9;};
    linkfont = font {shape= "Arial"; size= 9;};
    windowposn = (70, 28, 1189, 712);
    resolution = 72;
    drawingbounds = (1895, 973);
    showpagebreaks = FALSE;
    usegrid = TRUE;
    gridspace = (6, 6);
    NodeSet Node {BuiltIn = 1; Color = 0x00E1E1E1;};
    NodeSet Nature {BuiltIn = 1; Color = 0x00F8EED2;};
    NodeSet Deterministic {BuiltIn = 1; Color = 0x00D3CAA6;};
    NodeSet Finding {BuiltIn = 1; Color = 0x00C8C8C8;};
    NodeSet Constant {BuiltIn = 1; Color = 0x00FFFFFF;};
    NodeSet ConstantValue {BuiltIn = 1; Color = 0x00FFFB4;};
    NodeSet Utility {BuiltIn = 1; Color = 0x00FFBDBD;};
    NodeSet Decision {BuiltIn = 1; Color = 0x00DEE8FF;};
    NodeSet Documentation {BuiltIn = 1; Color = 0x00F0FAFA;};
    NodeSet Title {BuiltIn = 1; Color = 0x00FFFFFF;};
    PrinterSetting A {
        margins = (1270, 1270, 1270, 1270);
    };
};

node demMHW_m {
    kind = NATURE;
    discrete = FALSE;
    chance = CHANCE;
    statetitles = ("-10 to -1\n", "-1 to 0", "0 to 1", "1 to 5", "5 to 10");
    levels = (-10, -1, 0, 1, 5, 10);
};
```



```

parents = ();
probs =
    // -10 to -1  -1 to 0    0 to 1    1 to 5    5 to 10
    (0.4001461, 0.1883747, 0.1748023, 0.2360343, 6.426296e-4);
numcases = 4.19277e+07;
title = "Elevation (m)";
whenchanged = 1430849924;
belief = (0.4001461, 0.1883747, 0.1748023, 0.2360343, 6.426295e-4);
visual V1 {
    center = (162, 150);
    height = 1;
};
};

node landclass {
    kind = NATURE;
    discrete = TRUE;
    chance = CHANCE;
    states = (Subaqueous, Marsh, Beach, Rocky, Forest, Developed);
    levels = (1, 2, 3, 4, 5, 6);
    parents = (demMHW_m);
    probs =
        // Subaqueous  Marsh    Beach    Rocky    Forest    Developed    //
demMHW_m
    (0.9790752, 0.003672352, 0.0129401, 0.002128477, 6.657562e-4, 0.001518107, // -
10 to -1
    0.6987546, 0.1605342, 0.1057159, 0.003326611, 0.01712418, 0.01454446, // -
1 to 0
    0.2107605, 0.4047149, 0.0618361, 0.003098211, 0.1902146, 0.1293757, // 0
to 1
    0.04109905, 0.1948352, 0.01759592, 0.001539552, 0.3962848, 0.3486456, // 1
to 5
1.113214e-4, 0.9992579, 3.710713e-5, 3.710713e-5, 2.226428e-4, 3.339642e-4); // 5
to 10
;
    numcases =
        // demMHW_m
        (1.688155e7, // -10 to -1
        7.898128e6, // -1 to 0
        7.329068e6, // 0 to 1
        9.896386e6, // 1 to 5
        26949); // 5 to 10 ;
    title = "Land Cover (six classes)";
    comment = "MACT_final\n% 1 Water\n% 2 Marsh\n% 3 Beach\n% 4 Cliff\n% 5
Forest\n% 6 Developed";
    whenchanged = 1430849925;
    belief = (0.5699431, 0.1490851, 0.04005449, 0.002383337, 0.1302791, 0.108255);
    visual V1 {
        center = (150, 354);
        height = 2;
    };
};

ElimOrder = (demMHW_m, landclass);
};

```

## Land Cover – Elevation Network

// File created by LentzE at USGS using Netica 5.12 on Apr 12, 2019 at 16:06:25.

```
bnet LCENet_rev2 {
  AutoCompile = TRUE;
  autoupdate = TRUE;
  whenchanged = 1555099577;

  visual V1 {
    defdispform = BELIEFBARS;
    nodelabeling = TITLE;
    NodeMaxNumEntries = 50;
    nodefont = font {shape= "Arial"; size= 9;};
    linkfont = font {shape= "Arial"; size= 9;};
    windowposn = (39, 24, 379, 624);
    resolution = 72;
    drawingbounds = (1895, 973);
    showpagebreaks = FALSE;
    usegrid = TRUE;
    gridspace = (6, 6);
    NodeSet Node {BuiltIn = 1; Color = 0x00E1E1E1;};
    NodeSet Nature {BuiltIn = 1; Color = 0x00F8EED2;};
    NodeSet Deterministic {BuiltIn = 1; Color = 0x00D3CAA6;};
    NodeSet Finding {BuiltIn = 1; Color = 0x00C8C8C8;};
    NodeSet Constant {BuiltIn = 1; Color = 0x00FFFFFF;};
    NodeSet ConstantValue {BuiltIn = 1; Color = 0x00FFFB4;};
    NodeSet Utility {BuiltIn = 1; Color = 0x00FFBDBD;};
    NodeSet Decision {BuiltIn = 1; Color = 0x00DEE8FF;};
    NodeSet Documentation {BuiltIn = 1; Color = 0x00F0FAFA;};
    NodeSet Title {BuiltIn = 1; Color = 0x00FFFFFF;};
    PrinterSetting A {
      margins = (1270, 1270, 1270, 1270);
    };
  };

  node landclass {
    kind = NATURE;
    discrete = TRUE;
    chance = CHANCE;
    states = (Subaqueous, Marsh, Beach, Rocky, Forest, Developed);
    levels = (1, 2, 3, 4, 5, 6);
    parents = ();
    probs =
      // Subaqueous Marsh Beach Rocky Forest Developed
      (0.4811089, 0.1756256, 0.04858441, 0.002936886, 0.1624695,
0.1292746);
    numcases = 3.4872e+07;
    title = "Land Cover (six classes)";
    comment = "MACT_final\n% 1 Water\n% 2 Marsh\n% 3 Beach\n% 4 Cliff\n% 5
Forest\n% 6 Developed";
    whenchanged = 1550025712;
    belief = (0.4811089, 0.1756256, 0.04858441, 0.002936886, 0.1624695, 0.1292746);
```

```

visual V1 {
    center = (150, 354);
    height = 2;
};

node demMHW_m {
    kind = NATURE;
    discrete = FALSE;
    chance = CHANCE;
    statetitles = ("-10 to -1\n", "-1 to 0", "0 to 1", "1 to 5", "5 to 10");
    levels = (-10, -1, 0, 1, 5, 10);
    parents = (landclass);
    probs =
        // -10 to -1  -1 to 0   0 to 1    1 to 5    5 to 10    // landclass
        (0.6847238, 0.2303656, 0.0659187, 0.01849041, 5.015377e-4, //
Subaqueous
        0.009873758, 0.200762, 0.476491, 0.3086683, 0.004204972, // Marsh
        0.1281626, 0.4905391, 0.2660441, 0.1028303, 0.01242387, // Beach
        0.3511555, 0.257296, 0.2234351, 0.1559964, 0.01211689, // Rocky
        0.00202025, 0.02402113, 0.2507097, 0.7089995, 0.01424942, // Forest
        0.005789624, 0.02520239, 0.205275, 0.743661, 0.02007203); //
Developed ;
    numcases =
        // landclass
        (2.414176e7, // Subaqueous
        6.124416e6, // Marsh
        1.694238e6, // Beach
        1.02419e5, // Rocky
        5.665636e6, // Forest
        4.508065e6); // Developed ;
    title = "Elevation (m)";
    whenchanged = 1555099577;
    belief = (0.3394955, 0.1778388, 0.1962494, 0.2798874, 0.006528887);
    visual V1 {
        center = (162, 150);
        height = 1;
    };
};
ElimOrder = (landclass, demMHW_m);
};

```

## References:

- Gesch, D.B, The national elevation dataset, chap. 4 of Maune, D.F., ed., *Digital elevation model technologies and applications—The DEM users manual (2d ed.)* (pp.99-118). Bethesda, Md.: American Society for Photogrammetry and Remote Sensing.
- McGarigal K, Compton BW, Plunkett EB, Deluca WV, & Grand J.: *Designing sustainable landscapes: DSLland and Subsysland*. Report to the North Atlantic Conservation Cooperative, US Fish and Wildlife Service, Northeast Region: ([http://jamba.provost.ads.umass.edu/web/LCC/DSL\\_documentation\\_DSLland.pdf](http://jamba.provost.ads.umass.edu/web/LCC/DSL_documentation_DSLland.pdf)), 2017.
- National Oceanic and Atmospheric Administration National Geophysical Data Center, U.S. coastal relief model: National Oceanic and Atmospheric Administration National Geophysical Data Center Web page, last access 9 June 2014 at <http://www.ngdc.noaa.gov/mgg/coastal/crm.html>.
